# Supplementary material for: A Benchmark Evaluation of Adaptive Image Compression for Multi Picture Object Stereoscopic Images
Source: MDPI journal article supplement (doi:10.3390/jimaging7080160), 2021-08-23
Supplement: s1 [file s1]

# Supplementary Material: *A Benchmark Evaluation of Adaptive Image Compression for Multi Picture Object Stereoscopic Images*

This document details the experimental results related to the paper entitled “*A Benchmark Evaluation of Adaptive Image Compression for Multi Picture Object Stereoscopic Images*”. In the experiments here reported, the proposed method has been evaluated on 60 stereopairs from all the Middlebury Stereo Dataset versions published between 2001 and 2014, considering a low-quality factor equal to 65 or 70.

Table S1. Results on the Middlebury-scenes 2014 dataset, considering a low quality of 65.

| ID | Stereopair         | Size        | # of Blocks | Bitrate Saving (%) | Method            |          |                   |          |                   |          |                   |          |
|----|--------------------|-------------|-------------|--------------------|-------------------|----------|-------------------|----------|-------------------|----------|-------------------|----------|
|    |                    |             |             |                    | Low Quality 65    |          |                   |          |                   |          |                   |          |
|    |                    |             |             |                    | LmedS             |          |                   |          | Norm8Points       |          |                   |          |
|    |                    |             |             |                    | Harris            |          | SIFT              |          | Harris            |          | SIFT              |          |
|    |                    |             |             |                    | Lossy (dB)        | Time (s) |
| 1  | Adirondack-perfect | 1988 × 2880 | 3.479       | 43                 | 0.58              | 933      | 0.58              | 252      | <10 <sup>-4</sup> | 304      | 1.59              | 352      |
| 2  | Backpack-perfect   | 2016 × 2940 | 3.600       | 39                 | 1.32              | 846      | <10 <sup>-4</sup> | 684      | 1.32              | 239      | 1.33              | 339      |
| 3  | Bicycle1-perfect   | 2008 × 2988 | 3.577       | 37                 | 1.59              | 137      | 1.59              | 622      | 1.59              | 395      | 1.59              | 164      |
| 4  | Cable-perfect      | 1984 × 2796 | 3.381       | 41                 | 1.59              | 519      | 1.59              | 372      | 1.59              | 121      | 2.18              | 1,070    |
| 5  | Classroom1-perfect | 1920 × 3000 | 3.478       | 42                 | 1.00              | 174      | 1.00              | 190      | 1.00              | 124      | 1.00              | 535      |
| 6  | Couch-perfect      | 1992 × 2300 | 2.793       | 42                 | 1.59              | 266      | 2.00              | 339      | 2.59              | 1,068    | 2.01              | 356      |
| 7  | Flowers-perfect    | 1980 × 2880 | 3.479       | 38                 | 2.17              | 306      | 2.17              | 378      | 2.59              | 1,197    | 2.59              | 1,503    |
| 8  | Jadeplant-perfect  | 1988 × 2632 | 3.185       | 40                 | 1.74              | 346      | 2.32              | 632      | 2.91              | 924      | 2.92              | 1,040    |
| 9  | Mask-perfect       | 2008 × 2792 | 3.381       | 40                 | 2.74              | 140      | 1.41              | 600      | 1.83              | 377      | 2.75              | 1,813    |
| 10 | Motorcycle-perfect | 2000 × 2964 | 3.577       | 38                 | 1.74              | 218      | 1.74              | 525      | 1.74              | 303      | 2.07              | 605      |
| 11 | Piano-perfect      | 1920 × 2820 | 3.243       | 40                 | 1.74              | 170      | 1.74              | 304      | 2.06              | 178      | 2.07              | 347      |
| 12 | Pipes-perfect      | 1924 × 2960 | 3.431       | 38                 | 2.00              | 752      | 2.91              | 800      | 2.00              | 156      | 2.01              | 246      |
| 13 | Playroom-perfect   | 1908 × 2800 | 3.243       | 38                 | 2.32              | 349      | 2.32              | 687      | 2.32              | 265      | 2.32              | 478      |
| 14 | Playtable-perfect  | 1848 × 2724 | 3.082       | 38                 | 2.00              | 133      | 0.68              | 369      | 1.81              | 325      | 0.68              | 240      |
| 15 | Recycle-perfect    | 1924 × 2864 | 3.290       | 42                 | <10 <sup>-4</sup> | 154      | <10 <sup>-4</sup> | 230      | <10 <sup>-4</sup> | 92       | <10 <sup>-4</sup> | 151      |
| 16 | Shelves-perfect    | 2000 × 2952 | 3.577       | 41                 | 1.41              | 880      | 1.00              | 480      | 2.00              | 1,298    | 1.00              | 386      |
| 17 | Shopvac-perfect    | 1996 × 2356 | 2.842       | 42                 | <10 <sup>-4</sup> | 241      | <10 <sup>-4</sup> | 365      | <10 <sup>-4</sup> | 396      | <10 <sup>-4</sup> | 375      |
| 18 | Sticks-perfect     | 2008 × 2864 | 3.430       | 38                 | 2.42              | 164      | 1.26              | 351      | 2.23              | 778      | 1.49              | 253      |
| 20 | Sword1-perfect     | 2020 × 2912 | 3.600       | 39                 | 1.49              | 978      | 0.58              | 572      | 1.49              | 208      | 1.49              | 677      |
| 21 | Sword2-perfect     | 2000 × 2856 | 3.430       | 42                 | 2.59              | 156      | 1.00              | 378      | 1.00              | 748      | 1.00              | 288      |
| 22 | Umbrella-perfect   | 2016 × 2960 | 3.650       | 42                 | <10 <sup>-4</sup> | 183      | <10 <sup>-4</sup> | 646      | <10 <sup>-4</sup> | 391      | 1.00              | 1,000    |
| 23 | Vintage-perfect    | 1924 × 2912 | 3.384       | 36                 | 2.17              | 201      | 2.17              | 189      | 2.59              | 257      | 2.59              | 887      |
|    |                    |             |             | Average            | 40                | 1.55     | 375               | 1.28     | 453               | 1.58     | 461               | 596      |
|    |                    |             |             | St. Dev.           | 2.02              | 0.81     | 296               | 0.86     | 179               | 0.91     | 367               | 446      |

Table S2. Results on the middlebury-scenes 2014 dataset, considering a low quality of 70.

| ID | Stereopair         | Size        | # of Blocks | Bitrate Saving (%) | Method            |          |                   |          |                   |          |                   |          |
|----|--------------------|-------------|-------------|--------------------|-------------------|----------|-------------------|----------|-------------------|----------|-------------------|----------|
|    |                    |             |             |                    | Low Quality 70    |          |                   |          |                   |          |                   |          |
|    |                    |             |             |                    | LmedS             |          |                   |          | Norm8Points       |          |                   |          |
|    |                    |             |             |                    | Harris            |          | SIFT              |          | Harris            |          | SIFT              |          |
|    |                    |             |             |                    | Lossy (dB)        | Time (s) |
| 1  | Adirondack-perfect | 1988 × 2880 | 3479        | 38                 | <10 <sup>-4</sup> | 208      | <10 <sup>-4</sup> | 292      | <10 <sup>-4</sup> | 113      | 1.17              | 582      |
| 2  | Backpack-perfect   | 2016 × 2940 | 3600        | 33                 | 0.32              | 679      | <10 <sup>-4</sup> | 541      | 1.59              | 1,184    | 1.33              | 474      |
| 3  | Bicycle1-perfect   | 2008 × 2988 | 3577        | 32                 | 0.59              | 111      | 1.59              | 726      | 2.18              | 359      | 2.18              | 484      |
| 4  | Cable-perfect      | 1984 × 2796 | 3381        | 36                 | 2.18              | 882      | 2.18              | 674      | 0.59              | 183      | 0.59              | 201      |
| 5  | Classroom1-perfect | 1920 × 3000 | 3478        | 37                 | 1.00              | 148      | 1.00              | 156      | 1.00              | 890      | 1.00              | 584      |
| 6  | Couch-perfect      | 1992 × 2300 | 2793        | 36                 | 0.59              | 181      | 0.59              | 279      | 2.01              | 473      | 2.01              | 350      |
| 7  | Flowers-perfect    | 1980 × 2880 | 3479        | 33                 | 1.17              | 851      | 1.17              | 395      | 1.17              | 444      | 1.17              | 385      |
| 8  | Jadeplant-perfect  | 1988 × 2632 | 3185        | 34                 | 1.74              | 441      | 1.74              | 848      | 2.01              | 489      | 2.92              | 1,414    |
| 9  | Mask-perfect       | 2008 × 2792 | 3381        | 34                 | 1.84              | 774      | 2.16              | 1,448    | 2.16              | 294      | 1.84              | 633      |
| 10 | Motorcycle-perfect | 2000 × 2964 | 3577        | 33                 | 1.42              | 392      | 1.74              | 458      | 1.74              | 249      | 2.07              | 392      |
| 11 | Piano-perfect      | 1920 × 2820 | 3243        | 35                 | 1.74              | 222      | 2.07              | 708      | 1.74              | 210      | 2.07              | 240      |
| 12 | Pipes-perfect      | 1924 × 2960 | 3431        | 33                 | 2.01              | 671      | 2.33              | 1,346    | 2.01              | 255      | 2.01              | 268      |
| 13 | Playroom-perfect   | 1908 × 2800 | 3243        | 33                 | 2.07              | 543      | 2.07              | 772      | 2.07              | 138      | 2.33              | 413      |
| 14 | Playtable-perfect  | 1848 × 2724 | 3082        | 32                 | 0.90              | 966      | 0.68              | 168      | 0.68              | 207      | 0.90              | 340      |
| 15 | Recycle-perfect    | 1924 × 2864 | 3290        | 37                 | <10 <sup>-4</sup> | 184      | <10 <sup>-4</sup> | 191      | 1.00              | 95       | 1.00              | 446      |
| 16 | Shelves-perfect    | 2000 × 2952 | 3577        | 36                 | <10 <sup>-4</sup> | 289      | <10 <sup>-4</sup> | 307      | 0.59              | 525      | 2.01              | 1,088    |
| 17 | Shopvac-perfect    | 1996 × 2356 | 2842        | 37                 | <10 <sup>-4</sup> | 269      | <10 <sup>-4</sup> | 306      | <10 <sup>-4</sup> | 1003     | <10 <sup>-4</sup> | 315      |
| 18 | Sticks-perfect     | 2008 × 2864 | 3430        | 32                 | 0.26              | 226      | 0.68              | 333      | 1.27              | 253      | 1.27              | 409      |
| 20 | Sword1-perfect     | 2020 × 2912 | 3600        | 33                 | 0.91              | 1,488    | 0.59              | 407      | 1.91              | 1,737    | 0.91              | 319      |
| 21 | Sword2-perfect     | 2000 × 2856 | 3430        | 36                 | 2.18              | 1,696    | 1.00              | 546      | 1.00              | 1,196    | 1.00              | 855      |
| 22 | Umbrella-perfect   | 2016 × 2960 | 3650        | 38                 | 1.00              | 223      | 1.00              | 733      | 1.00              | 242      | 1.00              | 1,134    |
| 23 | Vintage-perfect    | 1924 × 2912 | 3384        | 31                 | 1.17              | 324      | 1.17              | 169      | 2.59              | 165      | 1.17              | 241      |
|    |                    |             |             | Average            | 35                | 1.05     | 535               | 1.08     | 537               | 1.38     | 486               | 526      |
|    |                    |             |             | St. Dev.           | 2.08              | 0.76     | 433               | 0.81     | 352               | 0.73     | 437               | 320      |

Table S3. Results on the Middlebury-scenes 2006 dataset, considering a low quality of 65.

| ID       | Stereo pair | Size      | # of Blocks | Bitrate Saving (%) | Method         |            |            |            |                   |            |            |            |
|----------|-------------|-----------|-------------|--------------------|----------------|------------|------------|------------|-------------------|------------|------------|------------|
|          |             |           |             |                    | Low Quality 65 |            |            |            |                   |            |            |            |
|          |             |           |             |                    | LmedS          |            |            |            | Norm8Points       |            |            |            |
|          |             |           |             |                    | Harris         |            | SIFT       |            | Harris            |            | SIFT       |            |
|          |             |           |             |                    | Lossy (dB)     | Time (sec) | Lossy (dB) | Time (sec) | Lossy (dB)        | Time (sec) | Lossy (dB) | Time (sec) |
| 1        | Aloe        | 555 × 641 | 224         | 37                 | 1.58           | 6          | 2.01       | 11         | 1.83              | 4          | 2.01       | 11         |
| 2        | Baby1       | 555 × 620 | 224         | 40                 | 0.87           | 4          | 1.24       | 6          | 1.65              | 26         | 1.24       | 6          |
| 3        | Baby2       | 555 × 620 | 224         | 39                 | 1.02           | 12         | 1.02       | 9          | 1.35              | 18         | 1.02       | 9          |
| 4        | Baby3       | 555 × 656 | 238         | 40                 | 1.61           | 36         | 1.35       | 13         | 1.02              | 6          | 1.35       | 13         |
| 5        | Bowling1    | 555 × 626 | 224         | 39                 | 1.00           | 10         | 1.59       | 5          | 1.91              | 27         | 1.59       | 5          |
| 6        | Bowling2    | 555 × 665 | 238         | 39                 | 1.81           | 9          | 2.27       | 15         | 1.81              | 13         | 2.27       | 15         |
| 7        | Cloth1      | 555 × 626 | 224         | 36                 | 1.52           | 11         | 1.77       | 6          | 1.77              | 11         | 1.77       | 6          |
| 8        | Cloth2      | 555 × 650 | 224         | 38                 | 1.75           | 22         | 1.65       | 9          | 1.85              | 20         | 1.65       | 9          |
| 9        | Cloth3      | 555 × 626 | 224         | 38                 | 1.85           | 9          | 1.85       | 15         | 2.18              | 24         | 1.85       | 15         |
| 10       | Cloth4      | 555 × 650 | 224         | 37                 | 2.18           | 27         | 1.84       | 8          | 1.91              | 10         | 1.84       | 8          |
| 11       | Flowerpots  | 555 × 656 | 238         | 39                 | 1.59           | 16         | 2.01       | 12         | 1.59              | 7          | 2.01       | 12         |
| 12       | Lampshade1  | 555 × 650 | 224         | 39                 | 3.18           | 14         | 3.18       | 13         | 1.91              | 9          | 3.18       | 13         |
| 13       | Lampshade2  | 555 × 650 | 224         | 39                 | 2.01           | 8          | 2.01       | 6          | 2.01              | 14         | 2.01       | 6          |
| 14       | Midd1       | 555 × 698 | 252         | 36                 | 1.49           | 5          | 2.42       | 31         | 1.49              | 8          | 2.42       | 31         |
| 15       | Midd2       | 555 × 683 | 238         | 36                 | 1.27           | 5          | 1.27       | 10         | 1.27              | 4          | 1.27       | 10         |
| 16       | Monopoly    | 555 × 665 | 238         | 36                 | 1.27           | 8          | 1.94       | 26         | 1.94              | 5          | 1.94       | 26         |
| 17       | Plastic     | 555 × 635 | 224         | 34                 | 0.42           | 9          | 0.42       | 13         | 0.42              | 7          | 0.42       | 13         |
| 18       | Rocks1      | 555 × 638 | 224         | 38                 | 1.65           | 8          | 2.40       | 13         | 1.65              | 15         | 2.40       | 13         |
| 19       | Rocks2      | 555 × 638 | 224         | 38                 | 1.65           | 9          | 2.05       | 8          | 2.05              | 5          | 2.05       | 8          |
| 20       | Wood1       | 555 × 686 | 238         | 42                 | 0.59           | 15         | 0.59       | 6          | 1.33              | 29         | 0.59       | 6          |
| 21       | Wood2       | 555 × 653 | 224         | 40                 | 1.42           | 31         | 0.42       | 8          | <10 <sup>-4</sup> | 6          | 0.42       | 8          |
| Average  |             |           |             | 38                 | 1.53           | 13         | 1.68       | 12         | 1.57              | 13         | 1.68       | 12         |
| St. Dev. |             |           |             | 1.68               | 0.59           | 8.73       | 0.69       | 6.50       | 0.54              | 8.11       | 0.69       | 6.50       |

Table S4. Results on the Middlebury-scenes 2006 dataset, considering a low quality of 70.

| ID       | Stereo pair | Size      | # of Blocks | Bitrate Saving (%) | Method         |          |                   |          |                   |          |                   |          |
|----------|-------------|-----------|-------------|--------------------|----------------|----------|-------------------|----------|-------------------|----------|-------------------|----------|
|          |             |           |             |                    | Low Quality 70 |          |                   |          |                   |          |                   |          |
|          |             |           |             |                    | LmedS          |          |                   |          | Norm8Points       |          |                   |          |
|          |             |           |             |                    | Harris         |          | SIFT              |          | Harris            |          | SIFT              |          |
|          |             |           |             |                    | Lossy (dB)     | Time (s) | Lossy (dB)        | Time (s) | Lossy (dB)        | Time (s) | Lossy (dB)        | Time (s) |
| 1        | Aloe        | 555 × 641 | 224         | 32                 | 1.26           | 9        | 1.45              | 18       | 1.52              | 8        | 1.52              | 8        |
| 2        | Baby1       | 555 × 620 | 224         | 34                 | 0.66           | 4        | 1.32              | 34       | 1.32              | 28       | 0.87              | 7        |
| 3        | Baby2       | 555 × 620 | 224         | 33                 | 1.61           | 18       | 1.61              | 32       | 1.61              | 9        | 1.02              | 10       |
| 4        | Baby3       | 555 × 656 | 238         | 34                 | 0.91           | 6        | 1.17              | 40       | 0.91              | 16       | 0.91              | 11       |
| 5        | Bowling1    | 555 × 626 | 224         | 33                 | 1.00           | 10       | 1.00              | 26       | 1.91              | 16       | 1.00              | 5        |
| 6        | Bowling2    | 555 × 665 | 238         | 33                 | 2.27           | 30       | 1.40              | 14       | 1.40              | 7        | 2.08              | 8        |
| 7        | Cloth1      | 555 × 626 | 224         | 31                 | 1.83           | 28       | 1.47              | 29       | 1.47              | 9        | 1.71              | 13       |
| 8        | Cloth2      | 555 × 650 | 224         | 32                 | 1.32           | 13       | 1.21              | 15       | 1.75              | 10       | 1.65              | 7        |
| 9        | Cloth3      | 555 × 626 | 224         | 32                 | 1.50           | 10       | 1.50              | 16       | 1.69              | 6        | 1.50              | 10       |
| 10       | Cloth4      | 555 × 650 | 224         | 31                 | 2.05           | 25       | 1.49              | 13       | 1.49              | 10       | 1.78              | 8        |
| 11       | Flowerpots  | 555 × 656 | 238         | 34                 | 1.59           | 9        | 1.59              | 22       | 2.01              | 16       | 2.42              | 19       |
| 12       | Lampshade1  | 555 × 650 | 224         | 33                 | 2.33           | 11       | 2.33              | 14       | 2.59              | 26       | 2.33              | 8        |
| 13       | Lampshade2  | 555 × 650 | 224         | 34                 | 2.01           | 8        | 2.01              | 8        | 2.01              | 8        | 2.33              | 30       |
| 14       | Midd1       | 555 × 698 | 252         | 31                 | 1.27           | 11       | 1.27              | 11       | 1.27              | 8        | 1.49              | 9        |
| 15       | Midd2       | 555 × 683 | 238         | 31                 | 0.68           | 4        | 0.68              | 14       | 0.68              | 4        | 1.49              | 29       |
| 16       | Monopoly    | 555 × 665 | 238         | 30                 | 1.10           | 5        | 1.94              | 29       | 1.27              | 15       | 1.94              | 20       |
| 17       | Plastic     | 555 × 635 | 224         | 29                 | 1.42           | 22       | 0.42              | 6        | 0.42              | 18       | 0.42              | 8        |
| 18       | Rocks1      | 555 × 638 | 224         | 32                 | 2.27           | 33       | 1.33              | 9        | 2.40              | 37       | 1.65              | 7        |
| 19       | Rocks2      | 555 × 638 | 224         | 32                 | 1.50           | 9        | 0.91              | 6        | 1.65              | 9        | 1.65              | 6        |
| 20       | Wood1       | 555 × 686 | 238         | 35                 | 0.56           | 16       | <10 <sup>-4</sup> | 12       | 1.33              | 29       | <10 <sup>-4</sup> | 8        |
| 21       | Wood2       | 555 × 653 | 224         | 33                 | 1.42           | 25       | 0.42              | 10       | <10 <sup>-4</sup> | 6        | 1.42              | 22       |
| Average  |             |           |             | 32                 | 1.47           | 15       | 1.26              | 18       | 1.46              | 14       | 1.48              | 12       |
| St. Dev. |             |           |             | 1.45               | 0.53           | 8.98     | 0.55              | 9.89     | 0.61              | 9.09     | 0.62              | 7.40     |

Table S5. Results on the middlebury-scenes 2005 dataset, considering a low quality of 65.

| ID      | Stereo pair | Size    | # of Blocks | Bitrate Saving (%) | Method         |            |            |            |             |            |            |            |
|---------|-------------|---------|-------------|--------------------|----------------|------------|------------|------------|-------------|------------|------------|------------|
|         |             |         |             |                    | Low Quality 65 |            |            |            |             |            |            |            |
|         |             |         |             |                    | LmedS          |            |            |            | Norm8Points |            |            |            |
|         |             |         |             |                    | Harris         |            | SIFT       |            | Harris      |            | SIFT       |            |
|         |             |         |             |                    | Lossy (dB)     | Time (sec) | Lossy (dB) | Time (sec) | Lossy (dB)  | Time (sec) | Lossy (dB) | Time (sec) |
| 1       | Art         | 555X695 | 238         | 42                 | 2,10           | 42         | 1,98       | 22         | 1,72        | 15         | 1,98       | 13         |
| 2       | Books       | 555X695 | 238         | 15                 | 2,01           | 15         | 2,28       | 23         | 2,28        | 11         | 2,61       | 37         |
| 3       | Computer    | 555X665 | 238         | 13                 | 1,69           | 13         | 1,69       | 8          | 1,95        | 7          | 1,95       | 12         |
| 4       | Dolls       | 555X695 | 238         | 10                 | 1,33           | 10         | 1,33       | 12         | 1,87        | 43         | 1,76       | 13         |
| 5       | Drumsticks  | 555X695 | 238         | 13                 | 2,01           | 13         | 2,01       | 10         | 2,12        | 7          | 2,12       | 13         |
| 6       | Dwarves     | 555X695 | 238         | 13                 | 1,59           | 13         | 1,59       | 11         | 1,59        | 16         | 1,59       | 10         |
| 7       | Laundry     | 555X671 | 238         | 13                 | 2,00           | 13         | 1,84       | 11         | 2,40        | 8          | 2,40       | 45         |
| 8       | Moebius     | 555X695 | 238         | 18                 | 1,62           | 18         | 1,62       | 12         | 1,62        | 9          | 2,17       | 26         |
| 9       | Reindeer    | 555X671 | 238         | 9                  | 1,84           | 9          | 1,64       | 12         | 1,84        | 6          | 1,84       | 8          |
| Average |             |         |             | 16                 | 1,80           | 16         | 1,78       | 14         | 1,93        | 13         | 2,05       | 20         |

Table S6. Results on the Middlebury-scenes 2005 dataset, considering a low quality of 70.

|            |            |             |                    | Method         |            |            |            |             |            |            |            |    |
|------------|------------|-------------|--------------------|----------------|------------|------------|------------|-------------|------------|------------|------------|----|
| Stereopair | Size       | # of Blocks | Bitrate Saving (%) | Low Quality 70 |            |            |            |             |            |            |            |    |
|            |            |             |                    | LmedS          |            |            |            | Norm8Points |            |            |            |    |
|            |            |             |                    | Harris         |            | SIFT       |            | Harris      |            | SIFT       |            |    |
| ID         |            |             |                    | Lossy (dB)     | Time (sec) | Lossy (dB) | Time (sec) | Lossy (dB)  | Time (sec) | Lossy (dB) | Time (sec) |    |
| 1          | Art        | 555X695     | 238                | 32             | 1,39       | 23         | 1,84       | 33          | 1,98       | 30         | 1,39       | 14 |
| 2          | Books      | 555X695     | 238                | 31             | 1,90       | 16         | 2,28       | 37          | 2,28       | 28         | 1,90       | 12 |
| 3          | Computer   | 555X665     | 238                | 30             | 1,27       | 9          | 1,10       | 9           | 1,10       | 6          | 1,95       | 9  |
| 4          | Dolls      | 555X695     | 238                | 32             | 1,76       | 25         | 1,23       | 15          | 1,76       | 30         | 1,33       | 12 |
| 5          | Drumsticks | 555X695     | 238                | 32             | 1,74       | 9          | 1,74       | 31          | 2,01       | 15         | 2,01       | 34 |
| 6          | Dwarves    | 555X695     | 238                | 32             | 2,01       | 29         | 1,13       | 9           | 1,40       | 16         | 1,59       | 24 |
| 7          | Laundry    | 555X671     | 238                | 30             | 1,69       | 11         | 1,69       | 11          | 2,00       | 17         | 2,13       | 42 |
| 8          | Moebius    | 555X695     | 238                | 33             | 1,47       | 12         | 1,14       | 9           | 1,47       | 6          | 1,62       | 9  |
| 9          | Reindeer   | 555X671     | 238                | 35             | 2,01       | 42         | 1,64       | 28          | 1,23       | 6          | 1,84       | 7  |
| Average    |            |             |                    | 32             | 1,69       | 19         | 1,53       | 20          | 1,69       | 17         | 1,75       | 18 |

Table S7. Results on the Middlebury-scenes 2003 dataset, considering a low quality of 65.

| Stereopair      Size      # of Blocks |       |         |     | Method             |            |            |            |            |             |            |            |            |
|---------------------------------------|-------|---------|-----|--------------------|------------|------------|------------|------------|-------------|------------|------------|------------|
|                                       |       |         |     | Low Quality 65     |            |            |            |            |             |            |            |            |
|                                       |       |         |     | Bitrate Saving (%) | LmedS      |            |            |            | Norm8Points |            |            |            |
| Harris                                |       | SIFT    |     |                    | Harris     |            | SIFT       |            |             |            |            |            |
| ID                                    |       |         |     |                    | Lossy (dB) | Time (sec) | Lossy (dB) | Time (sec) | Lossy (dB)  | Time (sec) | Lossy (dB) | Time (sec) |
| 1                                     | cones | 375X450 | 110 | 39                 | 1,26       | 3          | 1,26       | 3          | 1,30        | 7          | 1,30       | 2          |
| 2                                     | teddy | 375X450 | 110 | 40                 | 1,21       | 3          | 1,21       | 2          | 1,52        | 8          | 1,41       | 6          |
| Average                               |       |         |     | 40                 | 1,23       | 3          | 1,23       | 3          | 1,41        | 7          | 1,36       | 4          |

Table S8. Results on the Middlebury-scenes 2003 dataset, considering a low quality of 70.

| Stereopair      Size      # of Blocks |       |         |     | Method             |            |            |            |            |             |            |            |            |
|---------------------------------------|-------|---------|-----|--------------------|------------|------------|------------|------------|-------------|------------|------------|------------|
|                                       |       |         |     | Low Quality 70     |            |            |            |            |             |            |            |            |
|                                       |       |         |     | Bitrate Saving (%) | LmedS      |            |            |            | Norm8Points |            |            |            |
|                                       |       |         |     |                    | Harris     |            | SIFT       |            | Harris      |            | SIFT       |            |
| ID                                    |       |         |     |                    | Lossy (dB) | Time (sec) | Lossy (dB) | Time (sec) | Lossy (dB)  | Time (sec) | Lossy (dB) | Time (sec) |
| 1                                     | cones | 375X450 | 110 | 33                 | 1,13       | 3          | 1,17       | 5          | 1,38        | 7          | 1,33       | 3          |
| 2                                     | teddy | 375X450 | 110 | 34                 | 1,12       | 4          | 1,05       | 3          | 1,12        | 3          | 1,12       | 2          |
| Average                               |       |         |     | 34                 | 1,13       | 3          | 1,11       | 4          | 1,25        | 5          | 1,22       | 3          |

Table S9. Results on the Middlebury-scenes 2001 dataset, considering a low quality of 65.

| ID      | Stereopair | Size    | # of Blocks | Method             |                |            |            |            |             |            |            |   |  |
|---------|------------|---------|-------------|--------------------|----------------|------------|------------|------------|-------------|------------|------------|---|--|
|         |            |         |             | Bitrate Saving (%) | Low Quality 65 |            |            |            |             |            |            |   |  |
|         |            |         |             |                    | LmedS          |            |            |            | Norm8Points |            |            |   |  |
|         |            |         |             |                    | Harris         |            | SIFT       |            | Harris      |            | SIFT       |   |  |
|         |            |         |             | Lossy (dB)         | Time (sec)     | Lossy (dB) | Time (sec) | Lossy (dB) | Time (sec)  | Lossy (dB) | Time (sec) |   |  |
| 1       | barn1      | 381X432 | 110         | 40                 | 1,34           | 7          | 1,17       | 2          | 1,17        | 3          | 1,34       | 2 |  |
| 2       | barn2      | 381X430 | 110         | 42                 | 0,98           | 1          | 0,98       | 2          | 0,98        | 3          | 0,98       | 1 |  |
| 3       | bull       | 381X433 | 110         | 42                 | 1,00           | 1          | 1,00       | 2          | 1,00        | 2          | 1,14       | 3 |  |
| 4       | sawtooth   | 380X434 | 110         | 39                 | 1,45           | 3          | 1,45       | 2          | 1,63        | 2          | 1,68       | 3 |  |
| 5       | venus      | 383X434 | 110         | 40                 | 1,49           | 7          | 1,27       | 5          | 1,21        | 3          | 1,27       | 2 |  |
| Average |            |         |             | 40                 | 1,25           | 4          | 1,17       | 3          | 1,20        | 2          | 1,28       | 2 |  |

Table S10. Results on the Middlebury-scenes 2001 dataset, considering a low quality of 70.

| ID      | Stereopair | Size    | # of Blocks | Method             |            |            |            |            |             |            |            |   |
|---------|------------|---------|-------------|--------------------|------------|------------|------------|------------|-------------|------------|------------|---|
|         |            |         |             | Low Quality 70     |            |            |            |            |             |            |            |   |
|         |            |         |             | Bitrate Saving (%) | LmedS      |            |            |            | Norm8Points |            |            |   |
|         |            |         |             |                    | Harris     |            | SIFT       |            | Harris      |            | SIFT       |   |
|         |            |         |             | Lossy (dB)         | Time (sec) | Lossy (dB) | Time (sec) | Lossy (dB) | Time (sec)  | Lossy (dB) | Time (sec) |   |
| 1       | barn1      | 381X432 | 110         | 34                 | 1,09       | 2          | 1,09       | 3          | 1,09        | 3          | 1,26       | 2 |
| 2       | barn2      | 381X430 | 110         | 35                 | 0,77       | 1          | 0,77       | 2          | 0,77        | 2          | 1,04       | 4 |
| 3       | bull       | 381X433 | 110         | 35                 | 0,91       | 3          | 1,00       | 3          | 0,91        | 3          | 1,00       | 2 |
| 4       | sawtooth   | 380X434 | 110         | 33                 | 1,34       | 3          | 1,34       | 2          | 1,86        | 8          | 1,58       | 4 |
| 5       | venus      | 383X434 | 110         | 34                 | 1,08       | 7          | 1,08       | 4          | 1,32        | 4          | 1,27       | 2 |
| Average |            |         |             | 34                 | 1,04       | 3          | 1,06       | 3          | 1,19        | 4          | 1,23       | 3 |
